# Supplementary material for: One-Cell Doubling Evaluation by Living Arrays of Yeast, ODELAY!
Source: PubMed Central journal article supplement (PMC5217116; doi:10.1534/g3.116.037044), 2016-11-16
Supplement: 279TableS1.pdf [file 279TableS1.pdf]

**Table S1: All strains investigated in this study.**

| Strain Common Name | Strain Systematic Name | Strain Common Name | Strain Systematic Name | Strain Common Name | Strain Systematic Name | Strain Common Name | Strain Systematic Name |
|--------------------|------------------------|--------------------|------------------------|--------------------|------------------------|--------------------|------------------------|
| Acs1               | YAL054C                | Hst2               | YPL015C                | Nup133             | YKR082W                | Shg1               | YBR258C                |
| Adr1               | YDR216W                | Hst4               | YDR191W                | Nup170             | YBL079W                | Sif2               | YBR103W                |
| Ahc1               | YOR023C                | Htl1               | YCR020W-B              | Nup188             | YML103C                | Sin3               | YOL004W                |
| Aim4               | YBR194W                | Htz1               | YOL012C                | Nup2               | YLR335W                | Sir3               | YLR442C                |
| Arp5               | YNL059C                | Ies1               | YFL013C                | Nup53              | YMR153W                | Sir4               | YDR227W                |
| Arp6               | YLR085C                | Ies3               | YLR052W                | NUP60              | YAR002W                | Snf11              | YDR073W                |
| Asf1               | YJL115W                | loc2               | YLR095C                | NUP84              | YDL116W                | Snf12              | YNR023W                |
| Bre1               | YDL074C                | loc3               | YFR013W                | Oaf3               | YKR064W                | Snf2               | YOR290C                |
| Bre2               | YLR015W                | loc4               | YMR044W                | Paf1               | YBR279W                | Snf5               | YBR289W                |
| Cdc73              | YLR418C                | lsw1               | YBR245C                | Pex3               | YDR329C                | Snf6               | YHL025W                |
| Chd1               | YER164W                | lsw2               | YOR304W                | Pho23              | YNL097C                | Snl1               | YIL016W                |
| Chz1               | YER030W                | Itc1               | YGL133W                | Pip2               | YOR363C                | Snt1               | YCR033W                |
| Dot1               | YDR440W                | Kap114             | YGL241W                | Pml39              | YML107C                | Spp1               | YPL138C                |
| Dyn2               | YDR424C                | Kap120             | YPL125W                | Pom152             | YMR129W                | Spt20              | YOL148C                |
| Eaf3               | YPR023C                | Kap122             | YGL016W                | Pom34              | YLR018C                | Spt3               | YDR392W                |
| Eaf5               | YEL018W                | Kap123             | YER110C                | Rad54              | YGL163C                | Spt7               | YBR081C                |
| Eaf6               | YJR082C                | Leo1               | YOR123C                | Rad6               | YGL058W                | Sum1               | YDR310C                |
| Eaf7               | YNL136W                | Lge1               | YPL055C                | Rco1               | YMR075W                | Swc3               | YAL011W                |
| Esc1               | YMR219W                | Mad1               | YGL086W                | Rpd3               | YNL330C                | Swc5               | YBR231C                |
| Fpr4               | YLR449W                | Mad2               | YJL030W                | Rph1               | YER169W                | Swd1               | YAR003W                |
| Gcn5               | YGR252W                | Mak10              | YEL053C                | Rsc2               | YLR357W                | Swd3               | YBR175W                |
| Gfd1               | YMR255W                | Mak3               | YPR051W                | Rtf1               | YGL244W                | Swi3               | YJL176C                |
| Gis1               | YDR096W                | Mdm20              | YOL076W                | Rxt2               | YBR095C                | Swr1               | YDR334W                |
| Gtt3               | YEL017W                | Mip6               | YHR015W                | Rxt3               | YDL076C                | Taf14              | YPL129W                |
| Hda1               | YNL021W                | Mlp1               | YKR095W                | Sap30              | YMR263W                | Ubp8               | YMR223W                |
| Hda2               | YDR295C                | Mlp2               | YIL149C                | Sas2               | YMR127C                | Uip3               | YAR027W                |
| Hda3               | YPR179C                | Nap1               | YKR048C                | Sas3               | YBL052C                | Ume1               | YPL139C                |
| Hfi1               | YPL254W                | Nat1               | YDL040C                | Sas4               | YDR181C                | Ume6               | YDR207C                |
| Hos2               | YGL194C                | Nat3               | YPR131C                | Sas5               | YOR213C                | Vps71              | YML041C                |
| Hos3               | YPL116W                | Nat4               | YMR069W                | Sdc1               | YDR469W                | Vps72              | YDR485C                |
| Hos4               | YIL112W                | Nat5               | YOR253W                | Sds3               | YIL084C                | Vps75              | YNL246W                |
| Hpa3               | YEL066W                | Ngg1               | YDR176W                | Set2               | YJL168C                | Yaf9               | YNL107W                |
| Hsl7               | YBR133C                | Nhp10              | YDL002C                | Set3               | YKR029C                | Ydl089w            | Ydl089w                |
| Hst1               | YOL068C                | Nto1               | YPR031W                | Sgf11              | YPL047W                | Yng1               | YOR064C                |
|                    |                        | Nup100             | YKL068W                | Sgf73              | YGL066W                | Ypr174c            | Ypr174c                |
