# Supplementary material for: One-Cell Doubling Evaluation by Living Arrays of Yeast, ODELAY!
Source: PubMed Central journal article supplement (PMC5217116; doi:10.1534/g3.116.037044), 2016-11-16
Supplement: 279TableS2.pdf [file 279TableS2.pdf]

**Table S2: Comparison of ODELAY with other growth phenotype assays**

| Method                   | Assay type                     | Measure                  | Temporal analysis | Pixel resolution            | Measures Lag | Measures Doubling Time | Measures Carrying Capacity | Measures Clonal Heterogeneity | Reported Throughput                        |
|--------------------------|--------------------------------|--------------------------|-------------------|-----------------------------|--------------|------------------------|----------------------------|-------------------------------|--------------------------------------------|
| BioScreen™               | Liquid Culture                 | Optical Density at 600nm | Yes               | NA                          | Estimated    | Directly               | Directly                   | No                            | 200 growth curves /instrument              |
| SGA –Boone Lab           | Colony Pinning onto Agar       | Patch Area               | No                | 24 µm min<br>~42 µm typical | No           | No                     | Directly                   | No                            | 1536 patches /plate typical                |
| ScanLag                  | Colony Pinning onto Agar       | Patch Area               | Yes               | 24 µm min<br>~42 µm typical | Estimated    | Directly               | Directly                   | No                            | 1536 /plate typical                        |
| Ultra-High Density Omics | Colony Pinning onto Agar       | Patch Area               | Yes               | ~30 µm/pixel                | No           | Directly               | Directly                   | No                            | 6144 growth curves /plate                  |
| ScanoMatic               | Colony Pinning to Agar         | Patch Area               | Yes               | 24 µm min<br>~42 µm typical | Estimated    | Directly               | Directly                   | No                            | 1536 growth curves /plate typical          |
| Bet Hedging              | Liquid Culture                 | Multiple Colony Area     | Yes               | 0.65µm Est                  | No           | Directly               | No                         | Directly                      | 96 strains 1-1000 growth curves per strain |
| ODELAY                   | Single cell spotting onto Agar | Multiple Colony Area     | Yes               | 0.65µm                      | Directly     | Directly               | Directly                   | Directly                      | 96 strains 1-1000 growth curves per strain |
